1 **Microparticle-delivered Cxcl9 delays the relapse of Braf inhibitor-treated melanoma**

2 Gabriele Romano<sup>1,2,#</sup>, Francesca Paradiso<sup>3,4</sup>, John P Miller<sup>5</sup>, Roger J Liang<sup>2</sup>, Jennifer A Wargo<sup>6</sup>,  
3 Francesca Taraballi<sup>3</sup>, James C Costello<sup>7</sup>, Lawrence N Kwong<sup>2#</sup>

4

5 # Correspondence to:

6 #Gabriele Romano, Drexel University, College of Medicine, Dept. of Pharmacology and  
7 Physiology, 245 North 15th Street, Philadelphia, PA 19102, [gr476@drexel.edu](mailto:gr476@drexel.edu)

8 #Lawrence Kwong, University of Texas MD Anderson Cancer Center, Department of Translational  
9 Molecular Pathology, 2130 W Holcombe Blvd, Houston, TX 77030, [LKwong@mdanderson.org](mailto:LKwong@mdanderson.org)

10

11 Authors' affiliations:

12 1. Department of Pharmacology and Physiology, Drexel University College of Medicine,  
13 Philadelphia, Pennsylvania

14 2. Department of Translational Molecular Pathology, University of Texas MD Anderson  
15 Cancer Center, Houston, Texas

16 3. Center for Musculoskeletal Regeneration, Department of Orthopedics & Sports Medicine,  
17 Houston Methodist Research Institute, Houston, Texas

18 4. Reproductive Biology and Gynaecological Oncology Group, Swansea University Medical  
19 School, Swansea, United Kingdom

20 5. Department of Genomic Medicine, University of Texas MD Anderson Cancer Center,  
21 Houston, Texas

22 6. Department of Surgical Oncology, University of Texas MD Anderson Cancer Center,  
23 Houston, Texas

24 7. Department of Pharmacology, University of Colorado Anschutz Medical Campus, Aurora,  
25 Colorado

26 **Financial Support:** L.N.K. is supported by 1R01CA251608-01, 1R01HG011356-01,  
27 Melanoma Research Alliance 508743; J.C.C. is supported by U01CA231978; L.N.K. and F.T are  
28 supported by Melanoma Research Foundation 717906.

29

### 30 **ABSTRACT**

31 BRAF-mutant melanoma patients show significant responses to combined BRAF and MEK  
32 inhibition, but most patients relapse within 2 years. A major reservoir for such drug resistance is  
33 minimal residual disease (MRD), which is comprised of drug-tolerant tumor cells laying in a  
34 dormant state. Towards exploiting potential therapeutic vulnerabilities of MRD, we established a  
35 genetically engineered mouse model of  $Braf^{V600E}$ -driven melanoma MRD wherein genetic  
36  $Braf^{V600E}$  extinction leads to strong but incomplete tumor regression. Transcriptional timecourse  
37 analysis of tumors after  $Braf^{V600E}$  extinction revealed that after an initial surge of immune  
38 activation, tumors later became immunologically "cold" after MRD establishment, suggesting an  
39 immune-suppressive/evasive phenotype. Computational analysis identified candidate T-cell  
40 recruiting chemokines that may be central players in the process, being strongly upregulated  
41 initially and then steeply decreasing as the immune response faded. As a result, we hypothesized  
42 that sustaining the chemokine signaling could impair MRD maintenance through increased  
43 recruitment of effector T-cells. We show that intratumoral administration of recombinant Cxcl9,  
44 either naked or loaded in microparticles, significantly impaired the relapse of MRD in BRAF-  
45 inhibited tumors. Our experiments constitute a proof of concept that chemokine-based  
46 microparticle delivery systems are a potential strategy to forestall tumor relapse and thus improve  
47 the clinical success of frontline treatment methods.

## 48 INTRODUCTION

49 BRAF-mutant melanoma has become an archetype of targeted therapy after the successful  
50 advent of BRAF and MEK inhibitors (BRAFi and MEKi) in clinical practice. Melanoma patients  
51 carrying the BRAF<sup>V600E</sup> alteration, in particular, show impressive responses to combinations of  
52 BRAFi+MEKi, a therapeutic strategy that extends the lives of thousands of patients every year(1).  
53 Nevertheless, most melanoma patients show signs of relapse within the first 2 years after  
54 treatment start(1). The most frequent molecular mechanism of drug resistance is MAPK pathway  
55 reactivation through events such as BRAF amplification or the acquisition of additional MAPK-  
56 activating alterations(2). The occurrence of drug resistance and the eventual relapse can be  
57 explained by the survival of a cadre of tumor cells that eventually leads to tumor re-growth. These  
58 drug-tolerant cells constitute the Minimal Residual Disease (MRD), where cancer cells linger in a  
59 dormant state(3).

60 MRD can be fueled by intrinsic features of cancer cells or extrinsic mechanisms of the  
61 microenvironment. Among the extrinsic factors, one of the most relevant is the immune system.  
62 When targeted therapy is administered, a strong immune activation is triggered(4). BRAFi have  
63 been demonstrated to induce the expression of melanoma antigens, favoring the recognition by  
64 the immune system and the infiltration of CD8 effector and CD4 helper T-cells(5). In this regard,  
65 the magnitude of the mounted response is key to disease eradication. If a few cells manage to  
66 escape the initial immune response, they can fuel the establishment of MRD. Consistently, the  
67 patients with the most favorable long-term responses to BRAFi+MEKi are associated with a  
68 baseline elevated immune infiltrate, a status described as "hot" tumor bed(6-9). Contrariwise, the  
69 "cold" immune microenvironment is among the adverse prognostic factors of targeted therapy. A  
70 cold environment has a high abundance of suppressive cells and/or a low percent of effector and  
71 helper T-cells(10). In such a microenvironment, MRD has an increased possibility of surviving  
72 during treatment and, over time, acquiring the features to relapse to a full-blown tumor.

73 Converting a "cold" tumor microenvironment to a "hot" one is a potential mechanism to impair the  
74 establishment of MRD and prolong the clinical success of targeted therapy. Recruiting more  
75 effector cells to the tumor site can be a viable strategy for patients with low baseline immune  
76 infiltrate. In this work, we present a microparticle-based approach to favor the recruitment of Cd8+  
77 T cells into melanoma MRD using the computationally identified Cxcl9 chemokine. We  
78 demonstrate that the administration of Cxcl9 induces an ingress of Cd8+ T cells into the tumors  
79 and that, if administered concomitantly with BRAFi, significantly delays the occurrence of tumor  
80 relapse.

81

## 82 RESULTS

83 ***A mouse model of melanoma Minimal Residual Disease.*** As a Minimal Residual Disease  
84 (MRD) model, we utilized our previously described inducible and conditional GEMM model of  
85  $Braf^{V600E}$  mutant melanoma, iBIP(9). Briefly, topical 4-hydroxy-Tamoxifen (4-OHT) and systemic  
86 doxycycline (dox) administration restrict  $Braf^{V600E}$  expression and Pten and Cdkn2a knockout to  
87 melanocytes. These develop into fully formed melanomas in 6-8 weeks. Dox withdrawal causes  
88  $Braf^{V600E}$  extinction (hereafter "Braf extinction") and significant tumor regression, consistent with  
89 the driving oncogenic role of  $Braf^{V600E}$  (**Fig. 1A**). In nearly all cases (>90%), the regressed tumors  
90 do not entirely disappear but stall in a state of MRD (**Fig. 1A-B**). We verified that the tissue  
91 contains residual tumor cells through IHC staining of GFP, a built-in tumor marker (**Fig. S1**).  
92 Notably, the MRD is established around 30 days after Braf extinction and can be re-triggered with  
93 dox-induced Braf re-expression to cause a rapid tumor relapse, even after prolonged extinction  
94 (**Fig. 1A**). Overall, this model mimics  $Braf^{V600E}$  melanoma patients who initially respond to BRAFi,  
95 but who eventually relapse due to the occurrence of MAPK pathway reactivation.

96

97 **Transcriptomic time course analysis of MRD-establishment.** To investigate the molecular  
98 mechanisms underlying the establishment of MRD, we performed a time-course transcriptional  
99 analysis on iBIP tumors after Braf extinction. We collected 45 tumors from as early as 8h to as  
100 late as 160d after dox withdrawal.

101 Using RNA microarrays, we analyzed differentially regulated genes before and after MRD  
102 establishment (30d after Braf extinction) using the Short Time-series Expression Miner  
103 (STEM)(11) algorithm and detected multiple trends of interest (**Fig. 1C** and **Table S1**). The top-  
104 scoring gene sets downregulated in MRD, as expected, were ERK and proliferation pathways,  
105 reflecting the facts that MRD is quiescent and that Braf extinction impairs the MAPK pathway.  
106 Notably, we did not identify pathways significantly upregulated in MRD that would obviously  
107 contribute to cell survival; instead, the top pathways related to neural and skeletomuscular genes,  
108 possibly reflecting the larger relative contribution of normal neurons and muscle cells in the small  
109 MRD mass. Most intriguingly, we observed a strong enrichment for highly upregulated immune  
110 signature gene sets as early as 8h after Braf extinction, until 9 days when it then steeply declined  
111 to baseline upon MRD establishment (at ~30d, **Fig. 1C**). To dissect the involved immune  
112 pathways more finely, we performed GSEA analysis, which showed that the top 25 enriched  
113 pathways in the early phase of Braf extinction (before ~30d) were related to antigen presentation,  
114 lymphocyte homing, and activation (**Fig. 1D**). Consistently, immune cells deconvolution analysis  
115 (GEDIT) predicted an early influx of Cd3+ and Cd8+ T Cells and myeloid antigen-presenting cells,  
116 which faded away when MRD was established suggesting the acquisition of an immune  
117 evasive/suppressive phenotype (**Fig. 1E**).

118 To determine whether the immune response to Braf extinction is critical to the anti-tumoral effect,  
119 we inoculated iBIP-derived tumor cells into either iBIP (immunocompetent) or NSG (severely  
120 immunodeficient) mice. When doxycycline was withdrawn, NSG mice showed impaired tumor

121 shrinkage and increased spontaneous relapse, consistent with the hypothesis that MRD relapse  
122 is at least in part regulated by the immune microenvironment (**Fig. 1F**).

123

124 ***Cxcl9 is upregulated upon Braf extinction/inhibition and mirrors the overall immune***  
125 ***infiltrate dynamics.*** To nominate central regulators of the immune response to BRAFi, we  
126 adapted our published TRAP network analysis algorithm(9), designed to identify genes, in this  
127 case cytokines, that are most central to a set of biological processes by querying an extensive  
128 compendium of mouse expression datasets. Chemokines are a large category of molecules  
129 involved in the chemoattraction, activation, and differentiation of immune cells; thus, we  
130 hypothesized that they are central regulators of the immune response to BRAFi. Using the k-  
131 means clustering result (**Fig. 1D**), we identified 68 significantly enriched gene sets in the "immune  
132 activation" cluster (**Table S2**). We queried these 68 gene sets in the TRAP network to establish  
133 a subnetwork of cytokine-to-immune pathway relationships (**Fig. 2A**). The output of the TRAP  
134 analysis on the subnetwork is a weighted degree centrality score for each cytokine. We reasoned  
135 that cytokines that are initially highly upregulated upon BRAF extinction, then highly  
136 downregulated in MRD, and with a high degree centrality score, are high-confidence candidate  
137 immune regulators. We, therefore, plotted these elements together: high centrality score (**Fig. 2B**,  
138 circle size), significant downregulation from early BRAF extinction to MRD (**Fig.2 B**, negative log<sub>2</sub>  
139 fold-change and high statistical significance), and high upregulation from control to early BRAF  
140 extinction (**Fig. 2B**, circle color) (**Table S3**). Two of the top candidates, Cxcl9 and Cxcl10, are  
141 highly related paralogs whose protein products bind Cxcr3, are IFN-gamma response genes, and  
142 are well-described as important for Cxcr3+ T cell attraction and/or activation, including in  
143 melanoma (12). As shown in **Fig. 2C**, their expression pattern closely mirrored the overall immune  
144 score trend. Notably, upon BRAF re-expression-induced tumor relapse, the immune score and  
145 the Cxcr3 ligands remained low (**Fig. 2C**, "Relapse"). We note that a third paralog of the same

146 family, Cxcl11, showed similar parameters and trends to Cxcl9 and Cxcl10, except for a lower  
147 network centrality.

148 We then selected Cxcl9 as a representative Cxcr3 ligand for initial in vivo validation, as it had the  
149 largest and most significant fold-change of the 3 top candidates (**Fig. 2B**). We first validated Cxcl9  
150 protein expression using IHC, confirming an increase upon Braf extinction and a subsequent  
151 decrease over time (**Fig. 3A-B**). We also confirmed concurrent Cd8+ and Cd4+ T-cell infiltration  
152 and abatement, with Cd8+ T cell dynamics lagging slightly after Cxcl9, consistent with a potential  
153 regulatory association (**Fig. 3B**).

154 We next asked whether Cxcl9 is also induced by pharmacological BRAFi. In both the GEMM iBIP  
155 model (**Fig. 3C**) and the previously published syngeneic "BP" model(13)(**Fig. S3**), Cxcl9 and Cd8  
156 markers increased in the tumors in response to the BRAF inhibitor PLX4720, consistent with our  
157 genetic BRAF extinction results. To confirm clinical relevance, we analyzed our previously  
158 published human patient sample RNAseq dataset(9), which includes pre-treatment, on-treatment,  
159 and BRAFi-resistant biopsies. Similar to our mouse models, both CXCL9 and CD8A expression  
160 sharply rose on BRAFi treatment and abated upon the acquisition of BRAFi resistance (**Fig. 3E-**  
161 **F**).

162

### 163 ***Recombinant Cxcl9 administration chemoattracts Cd8 lymphocytes in vitro and in vivo.***

164 We next reasoned that one or all three of these Cxcr3 ligands might regulate T cell tumor  
165 infiltration and/or activation in response to BRAF inhibition. First, we verified the ability of  
166 recombinant mouse Cxcl9 (rCxcl9) to attract Cd8+ mouse lymphocytes in vitro using a transwell  
167 assay. As shown in **Fig. 4A**, Cxcl9 significantly induced Cd8+ T cell chemoattraction in a dose-  
168 dependent manner, and similarly to its paralogs Cxcl10 and Cxcl11 (**Fig. 4A**). Interestingly, Cxcl9

169 and Cxcl11, but not Cxcl10, also slightly induced activation markers in T Cd8+ cells (Cd69, early  
170 and Cd25, late activation marker, **Fig. S2**).

171 We then tested Cxcl9 chemoattraction in vivo. We injected rCxcl9 (10ug/administration)  
172 intratumorally for 3 days and then analyzed the abundance of the infiltrating Cd8+ T cell  
173 population. As expected, rCxcl9 specifically recruited Cd8+Cxcr3+ cells into the tumors,  
174 consistent with Cxcr3 as the known binding receptor of Cxcl9 (**Fig. 4B**). To validate the therapeutic  
175 potential of our findings, we tested the effect of rCxcl9 administration in iBIP allografts. We injected  
176 rCxcl9 intratumorally (0.5-1µg/administration, QD) for 3 weeks after dox withdrawal. After MRD  
177 establishment, we re-administered dox and monitored tumors for re-growth. Notably, the control  
178 group relapsed significantly more and earlier than the rCxcl9-treated group over the observation  
179 period (**Fig. 4C**).

180

181 ***A microparticle-based approach for chemokine delivery.*** A potential hurdle to translating  
182 Cxcl9 into therapy is that chemokines are rapidly degraded in vivo. Nanoparticles for drug delivery  
183 applications have been developed to overcome some of the limitations of free therapeutics,  
184 including drug stability and release kinetics(14,15). Toward this aim, we leveraged an approach  
185 in which rCxcl9 is encapsulated in microparticles composed of a silica core and a poly(DL-lactide-  
186 co-glycolide) acid (PLGA) outer shell (**Fig. A**)(15). PLGA-silica particles assure chemokines  
187 protection from degradation while providing a steady release and supply.

188 In vitro experiments confirmed that PLGA microparticles release rCxcl9 efficiently and attract  
189 Cd8+ T mouse lymphocytes in vitro (**Fig. 4D**) to levels similar to that of naked rCxcl9. Next, we  
190 utilized the well-established Yumm1.7 syngeneic melanoma model(16) to further confirm our  
191 initial findings in the iBIP model. Yumm1.7 tumors have the same clinically relevant genetic  
192 alterations as iBIP (Pten<sup>-/-</sup>; Cdkn2a<sup>-/-</sup>; Braf<sup>V600E</sup>), sharply respond to pharmacologic BRAFi, and



193 establish MRD with a natural eventual tumor relapse in syngeneic immunocompetent C57BL6/J  
194 mice hosts.

195 To determine whether rCxcl9 loaded PLGA microparticles affect melanoma relapse, we induced  
196 Yumm1.7 tumors and divided mice into 4 groups (n=10 per cohort): Control Vehicle (Ctrl), BRAFi,  
197 BRAFi + PLGA microparticles loaded with BSA (BRAFi+BSA), and BRAFi + PLGA microparticles  
198 loaded with rCxcl9 (BRAFi+rCxcl9). Between the PLGA tested concentrations (10% or 5% PLGA  
199 50:50), 10% was chosen for translation in vivo since it induced the highest migration of T CD-8  
200 cells in vitro. Starting 3 days after BRAFi, the two PLGA groups were injected intratumorally with  
201 microparticles for 3 weeks, once a week, at 50ug of total rCxcl9 or BSA per administration. All  
202 groups were continuously maintained on BRAFi and monitored for tumor relapse, which we  
203 defined as the first tumor size doubling after MRD establishment. As expected, the vehicle control  
204 group with no BRAFi needed to be euthanized before 21d after tumor cell injection. By contrast,  
205 BRAFi and BRAFi+Empty groups relapsed after a median of 29 and 27.5 days after BRAFi start,  
206 respectively (**Fig. 4E**), indicating no effect of the microparticles themselves. Notably, the  
207 BRAFi+rCxcl9 group showed a significantly delayed relapse (median 43.5 days, **Fig. 4E**),  
208 supporting a positive therapeutic effect of rCxcl9 and the feasibility of microparticle delivery.

209

## 210 **DISCUSSION**

211 In this study, we demonstrated that Cxcl9 is a key immune modulator of the BRAFi-induced MRD  
212 state, which in turn manifests as a combination therapeutic modality to forestall tumor relapse.  
213 We leveraged the protection of PLGA-silica microparticles for rCxcl9 delivery, enabling slow  
214 intratumoral release over time, which both reduces the frequency of administration and provides  
215 a consistent output. This discovery spurs from the transcriptional and phenotypic characterization  
216 of a GEMM model of melanoma MRD. We utilized our previously published TRAP algorithm to

217 prioritize key chemokines potentially regulating MRD establishment and maintenance, which was  
218 then validated in pharmacological, immunocompetent BRAF inhibition models.

219 While we selected Cxcl9 as our proof-of-principle chemokine, we also identified a host of other  
220 chemokines whose temporal expression profiles suggest a similar immune regulatory role;  
221 specifically, our evidence suggests their downregulation may help create the immunologically  
222 "cold" state of MRD with a low abundance of CD8+ T-cells. Of particular interest are the CXCL9  
223 paralogs CXCL10 and CXCL11, all three of which are IFN-gamma induced chemokines known to  
224 regulate T-cell homing through their CXCR3 cognate receptor(12). Indeed, intratumoral rCxcl9  
225 specifically increased the influx of Cxcr3+Cd8+ T cells into the tumor. Interestingly, despite a high  
226 degree of amino acid identity, Cxcl9, Cxcl10, and Cxcl11 are known to have different roles in  
227 inflammation, graft versus host disease, and cancer(17). Consistent with this, we found differing  
228 effects of the 3 proteins on Cd8+ T cell phenotypes in vitro, with all three showing chemoattraction  
229 but Cxcl10 showing less T cell activation. Thus, we hypothesize that future testing of combinations  
230 of the 3 CXCR3 ligands and/or other high-scoring cytokines may show improved anti-tumor  
231 efficacy. Because of their versatile properties, the PLGA-silica microparticle approach we utilized  
232 is ideally suited for these future directions. Silica nanostructures can be tailored during  
233 manufacturing, changing their size, shape, porosity, and pore size to efficiently load a wide range  
234 of small and large biomolecules. Also, they can be incorporated into a wide range of synthetic  
235 polymers to finely tune the release of cytokines (18). In addition, PLGA-mp tolerability in vivo has  
236 been published extensively in different model systems, such as cancer and inflammatory diseases  
237 (18). Notably, the polymer used in this work, PLGA, is approved by the Food and Drug  
238 Administration to use in drug delivery systems, positioning PLGA-based approaches as promising  
239 candidates for future clinical trials.

240 Our results showing a significant delay in tumor relapse after microparticle-delivered rCxcl9 are  
241 consistent with the anti-tumor effect of Cxcr3 ligands seen in previous studies (19-21).

242 Nevertheless, the present work is the first to show chemokine therapy effect in a melanoma or  
243 MRD setting and the first to demonstrate the utility of a microparticle-based delivery. Therefore,  
244 we propose that CXCR3 ligands are clinically relevant to targeted therapies, particularly as  
245 CXCL9 expression is strongly induced in BRAFi-treated melanoma patients but return to baseline  
246 in relapsing patients, mirroring CD8 expression dynamics and the observations in our mouse  
247 models. Consistent with this, multiple studies have found that CXCR3 ligands are critical for the  
248 action of anti-PD1/PDL1 immune checkpoint therapies (22,23).

249 Our findings demonstrate that chemokine-based approaches are a feasible strategy to regulate  
250 the immune infiltrate composition of tumors, particularly if coupled with an efficient delivery  
251 system. Immunologically "cold" tumors are, in fact, a widespread clinical problem and especially  
252 relevant to current checkpoint inhibitor therapies(4,10). Indeed, as the combination of targeted  
253 and immune approaches is experiencing the beginnings of clinical validation(24,25), there is  
254 evidence showing that baseline immune "cold" tumors can remain refractory(10,26). Chemokine-  
255 based approaches may be ideally suited to solving such issues by converting tumors to an  
256 immune "hot" microenvironment for subsequent targeted and immune checkpoint therapies to  
257 create synergy.

258 Overall, our results demonstrate that fine-tuning the composition of the immune infiltrate can be  
259 a viable adjuvant approach to boosting existing and experimental treatment approaches and  
260 eventually improve their therapeutic outcome.

261

262

263

264

265 **FIGURE LEGENDS**

266 **Figure 1. A GEMM model of melanoma reveals that Minimal Residual Disease (MRD) is a**  
267 **"cold" immune microenvironment.** A) Tumor growth curve of iBIP mice treated with  
268 Doxycycline (dox) administration, after Braf extinction, and after Braf re-induction. B)  
269 Representative pictures of tumor-bearing iBIP mice on dox, after Braf extinction, and after Braf  
270 re-induction. C) Top 3 enriched pathways in early Braf extinction vs. MRD according to Gene Set  
271 Enrichment Analysis (GSEA) analysis. D) k-means clustering of microarray data of 45 tumors.  
272 Three clusters of interest are reported, and the number of genes in the cluster is specified.  
273 Indicated days are after BRAF extinction (dox withdrawal). E) Immune deconvolution analysis  
274 (GEDIT) predicting the immune infiltrate composition in iBIP tumors on dox, during early BRAFi  
275 (<30d), during MRD (>30d), and in Braf re-expression-induced relapsing tumors (Rel). F) Tumor  
276 growth curves of Braf-extinguished iBIP tumor xenografts in immunocompetent mice (iBIP) or  
277 immune-deficient mice (NSG). The indicated p-value is calculated in an unpaired t-test between  
278 groups 30d after tumor extinction.

279 **Figure 2. Cxcr3 ligands are key players in the immune response to BRAF extinction.** A).  
280 Visual representation of cytokine-to-pathway connections of the TRAP network. Cytokines (ovals)  
281 and relevant associated pathways (rectangles) are shown. Color coding for chemokines  
282 represents log2 fold change in MRD vs. Early Braf extinction. B) Volcano plot representing the  
283 log2 fold change from early Braf extinction to MRD of the indicated chemokines (x-axis), and the  
284 corresponding log2 p-value (y-axis). The size of the circles represents centrality calculated by  
285 TRAP, and the color of the circle represents the log2 fold change from control to early Braf  
286 extinction. Only the 102 highest-centrality genes are shown for clarity. C) Cxcl9, Cxcl10, and  
287 Cxcl11 expression over time compared with the overall immune signature.

288 **Figure 3. CXCL9 is induced by genetic and pharmacologic BRAF inhibition in mouse and**  
289 **human tumors.** A) Representative immunofluorescences (IFs) for Cxcl9 protein in iBIP sections,

290 before and after dox withdrawal. DAPI nuclear staining and Hematoxylin staining are shown. Bars  
291 represent 100  $\mu\text{m}$ . B) IF timecourse quantification of Cxcl9, Cd4, and Cd8 positive cells in iBIP  
292 sections after dox withdrawal (n=5, per time point). C) IF quantification of Cxcl9 and Cd8 positive  
293 cells in iBIP tumor sections after pharmacologic BRAFi (PLX4720, 417 parts per million, ppm, 1  
294 week of treatment). D) CXCL9 and E) CD8 mRNA levels in melanoma patients pre-treatment, on  
295 BRAFi, and resistant to the treatment, as measured by RNAseq(9).

296 **Figure 4. Recombinant Cxcl9 attracts Cd8 T cells in vitro and in vivo and delays the**  
297 **occurrence of tumor relapse.** A) Transwell migration assay of mouse Cd8<sup>+</sup> T-cells using  
298 chemokines at the indicated concentrations. The migration index is calculated as the number of  
299 cells migrated over the total number of cells. B) Flow Cytometric analysis of Cxcr3<sup>+</sup> and Cxcr3<sup>-</sup>  
300 Cd8<sup>+</sup> T cell abundance in "BP" tumors after intratumoral injection of rCxcl9 (10 $\mu\text{g}$ /administration,  
301 for 3 days) or vehicle. C) Survival curves of iBIP allografts injected with rCxcl9 or vehicle (n $\geq$ 5)  
302 after dox withdrawal. At MRD establishment, tumors were rechallenged with dox and observed  
303 for relapse. A death event is considered as the first tumor doubling after MRD acquisition. D)  
304 Transwell migration assay for mCd8<sup>+</sup> T cells using BSA- or rCxcl9-loaded PLGA microparticles.  
305 The migration index is calculated as the number of cells migrated over the total number of cells.  
306 E) Survival curves of Yumm1.7 tumors treated with PLX4720 with or without microparticles that  
307 contained BSA or rCxcl9 (n=10). A death event is considered as the first tumor doubling after  
308 MRD acquisition. The vehicle control group with no BRAFi needed to be euthanized before BRAFi  
309 and therefore cannot be represented on this graph. F) Schematic of the rational treatment  
310 approach proposed in the present work.

311

312

313

314

315

316 **REFERENCES**

- 317 1. Flaherty KT, Infante JR, Daud A, Gonzalez R, Kefford RF, Sosman J, *et al.* Combined  
318 BRAF and MEK inhibition in melanoma with BRAF V600 mutations. *N Engl J Med*  
319 **2012**;367(18):1694-703 doi 10.1056/NEJMoa1210093.
- 320 2. Rizos H, Menzies AM, Pupo GM, Carlino MS, Fung C, Hyman J, *et al.* BRAF inhibitor  
321 resistance mechanisms in metastatic melanoma: spectrum and clinical impact. *Clin*  
322 *Cancer Res* **2014**;20(7):1965-77 doi 10.1158/1078-0432.CCR-13-3122.
- 323 3. Bivona TG, Doebele RC. A framework for understanding and targeting residual disease  
324 in oncogene-driven solid cancers. *Nat Med* **2016**;22(5):472-8 doi 10.1038/nm.4091.
- 325 4. Galon J, Bruni D. Approaches to treat immune hot, altered and cold tumours with  
326 combination immunotherapies. *Nat Rev Drug Discov* **2019**;18(3):197-218 doi  
327 10.1038/s41573-018-0007-y.
- 328 5. Frederick DT, Piris A, Cogdill AP, Cooper ZA, Lezcano C, Ferrone CR, *et al.* BRAF  
329 Inhibition Is Associated with Enhanced Melanoma Antigen Expression and a More  
330 Favorable Tumor Microenvironment in Patients with Metastatic Melanoma. *Clinical*  
331 *Cancer Research* **2013**;19(5):1225-31 doi 10.1158/1078-0432.ccr-12-1630.
- 332 6. Cooper ZA, Reuben A, Spencer CN, Prieto PA, Austin-Breneman JL, Jiang H, *et al.*  
333 Distinct clinical patterns and immune infiltrates are observed at time of progression on  
334 targeted therapy versus immune checkpoint blockade for melanoma. *Oncoimmunology*  
335 **2016**;5(3):e1136044 doi 10.1080/2162402X.2015.1136044.
- 336 7. Massi D, Brusa D, Merelli B, Falcone C, Xue G, Carobbio A, *et al.* The status of PD-L1  
337 and tumor-infiltrating immune cells predict resistance and poor prognosis in BRAFi-  
338 treated melanoma patients harboring mutant BRAFV600. *Ann Oncol* **2015**;26(9):1980-7  
339 doi 10.1093/annonc/mdv255.

- 340 8. Yan Y, Wongchenko MJ, Robert C, Larkin J, Ascierto PA, Dreno B, *et al.* Genomic  
341 Features of Exceptional Response in Vemurafenib +/- Cobimetinib-treated Patients with  
342 BRAF (V600)-mutated Metastatic Melanoma. *Clin Cancer Res* **2019**;25(11):3239-46 doi  
343 10.1158/1078-0432.CCR-18-0720.
- 344 9. Kwong LN, Boland GM, Frederick DT, Helms TL, Akid AT, Miller JP, *et al.* Co-clinical  
345 assessment identifies patterns of BRAF inhibitor resistance in melanoma. *J Clin Invest*  
346 **2015**;125(4):1459-70 doi 10.1172/JCI78954.
- 347 10. Bonaventura P, Shekarian T, Alcazer V, Valladeau-Guilemond J, Valsesia-Wittmann S,  
348 Amigorena S, *et al.* Cold Tumors: A Therapeutic Challenge for Immunotherapy. *Front*  
349 *Immunol* **2019**;10:168 doi 10.3389/fimmu.2019.00168.
- 350 11. Ernst J, Bar-Joseph Z. STEM: a tool for the analysis of short time series gene  
351 expression data. *BMC Bioinformatics* **2006**;7:191 doi 10.1186/1471-2105-7-191.
- 352 12. Tokunaga R, Zhang W, Naseem M, Puccini A, Berger MD, Soni S, *et al.* CXCL9,  
353 CXCL10, CXCL11/CXCR3 axis for immune activation - A target for novel cancer  
354 therapy. *Cancer Treat Rev* **2018**;63:40-7 doi 10.1016/j.ctrv.2017.11.007.
- 355 13. Dankort D, Curley DP, Cartlidge RA, Nelson B, Karnezis AN, Damsky WE, Jr., *et al.*  
356 Braf(V600E) cooperates with Pten loss to induce metastatic melanoma. *Nat Genet*  
357 **2009**;41(5):544-52 doi 10.1038/ng.356.
- 358 14. Mitchell MJ, Billingsley MM, Haley RM, Wechsler ME, Peppas NA, Langer R.  
359 Engineering precision nanoparticles for drug delivery. *Nat Rev Drug Discov*  
360 **2021**;20(2):101-24 doi 10.1038/s41573-020-0090-8.
- 361 15. Minardi S, Pandolfi L, Taraballi F, De Rosa E, Yazdi IK, Liu X, *et al.* PLGA-Mesoporous  
362 Silicon Microspheres for the in Vivo Controlled Temporospacial Delivery of Proteins. *ACS*  
363 *Appl Mater Interfaces* **2015**;7(30):16364-73 doi 10.1021/acsami.5b03464.

- 364 16. Meeth K, Wang JX, Micevic G, Damsky W, Bosenberg MW. The YUMM lines: a series of  
365 congenic mouse melanoma cell lines with defined genetic alterations. *Pigment Cell*  
366 *Melanoma Res* **2016**;29(5):590-7 doi 10.1111/pcmr.12498.
- 367 17. Groom JR, Luster AD. CXCR3 ligands: redundant, collaborative and antagonistic  
368 functions. *Immunol Cell Biol* **2011**;89(2):207-15 doi 10.1038/icb.2010.158.
- 369 18. Danhier F, Ansorena E, Silva JM, Coco R, Le Breton A, Preat V. PLGA-based  
370 nanoparticles: an overview of biomedical applications. *J Control Release*  
371 **2012**;161(2):505-22 doi 10.1016/j.jconrel.2012.01.043.
- 372 19. Chow MT, Ozga AJ, Servis RL, Frederick DT, Lo JA, Fisher DE, *et al.* Intratumoral  
373 Activity of the CXCR3 Chemokine System Is Required for the Efficacy of Anti-PD-1  
374 Therapy. *Immunity* **2019**;50(6):1498-512 e5 doi 10.1016/j.immuni.2019.04.010.
- 375 20. Pan J, Burdick MD, Belperio JA, Xue YY, Gerard C, Sharma S, *et al.* CXCR3/CXCR3  
376 ligand biological axis impairs RENCA tumor growth by a mechanism of  
377 immunoangiostasis. *J Immunol* **2006**;176(3):1456-64 doi 10.4049/jimmunol.176.3.1456.
- 378 21. Ohtani H, Jin Z, Takegawa S, Nakayama T, Yoshie O. Abundant expression of CXCL9  
379 (MIG) by stromal cells that include dendritic cells and accumulation of CXCR3+ T cells in  
380 lymphocyte-rich gastric carcinoma. *J Pathol* **2009**;217(1):21-31 doi 10.1002/path.2448.
- 381 22. Reschke R, Yu J, Flood B, Higgs EF, Hatogai K, Gajewski TF. Immune cell and tumor  
382 cell-derived CXCL10 is indicative of immunotherapy response in metastatic melanoma. *J*  
383 *Immunother Cancer* **2021**;9(9) doi 10.1136/jitc-2021-003521.
- 384 23. House IG, Savas P, Lai J, Chen AXY, Oliver AJ, Teo ZL, *et al.* Macrophage-Derived  
385 CXCL9 and CXCL10 Are Required for Antitumor Immune Responses Following Immune  
386 Checkpoint Blockade. *Clin Cancer Res* **2020**;26(2):487-504 doi 10.1158/1078-  
387 0432.CCR-19-1868.
- 388 24. Dummer R, Lebbe C, Atkinson V, Mandala M, Nathan PD, Arance A, *et al.* Combined  
389 PD-1, BRAF and MEK inhibition in advanced BRAF-mutant melanoma: safety run-in and



390 biomarker cohorts of COMBI-i. *Nat Med* **2020**;26(10):1557-63 doi 10.1038/s41591-020-  
391 1082-2.

392 25. Ribas A, Lawrence D, Atkinson V, Agarwal S, Miller WH, Jr., Carlino MS, *et al.*  
393 Combined BRAF and MEK inhibition with PD-1 blockade immunotherapy in BRAF-  
394 mutant melanoma. *Nat Med* **2019**;25(6):936-40 doi 10.1038/s41591-019-0476-5.

395 26. Herbst RS, Soria JC, Kowanetz M, Fine GD, Hamid O, Gordon MS, *et al.* Predictive  
396 correlates of response to the anti-PD-L1 antibody MPDL3280A in cancer patients.  
397 *Nature* **2014**;515(7528):563-7 doi 10.1038/nature14011.

398

# FIGURE 1

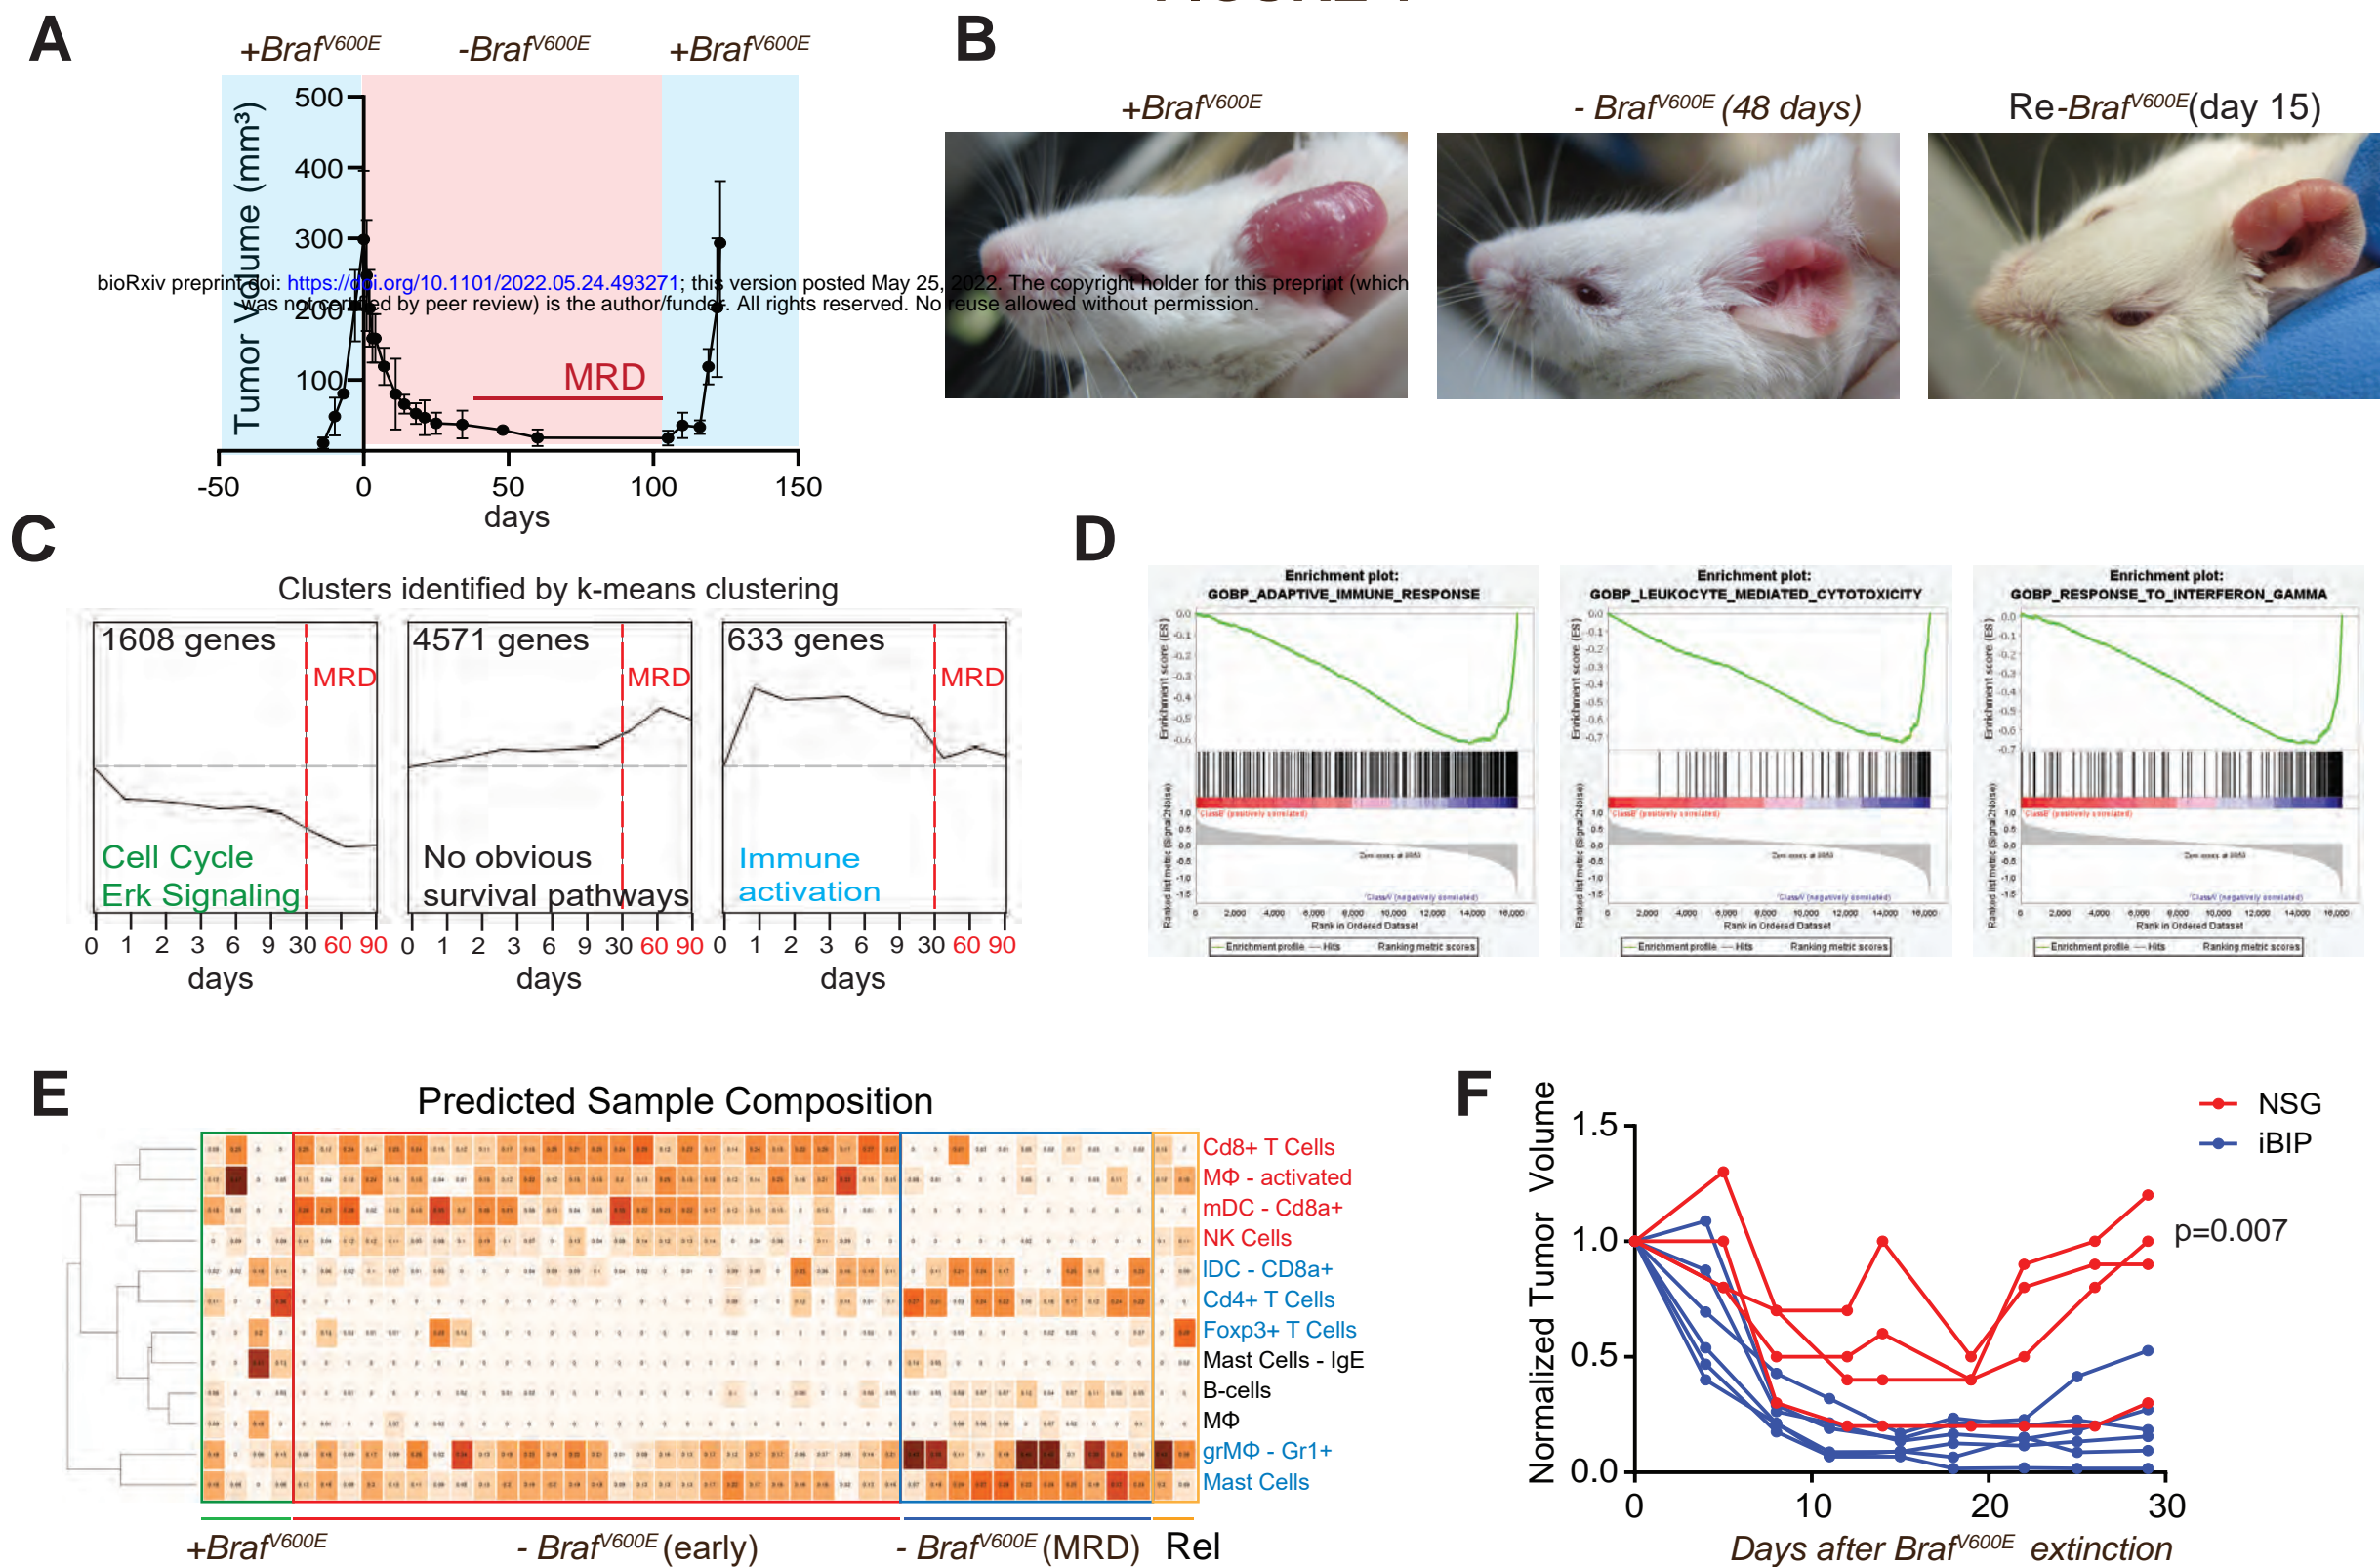

**Figure 1. A GEMM model of melanoma reveals that Minimal Residual Disease (MRD) is a "cold" immune microenvironment.** A) Tumor growth curve of iBIP mice treated with Doxycycline (dox) administration, after Braf extinction, and after Braf re-induction. B) Representative pictures of tumor-bearing iBIP mice on dox, after Braf extinction, and after Braf re-induction. C) Top 3 enriched pathways in early Braf extinction vs. MRD according to Gene Set Enrichment Analysis (GSEA) analysis. D) k-means clustering of microarray data of 45 tumors. Three clusters of interest are reported, and the number of genes in the cluster is specified. Indicated days are after BRAF extinction (dox withdrawal). E) Immune deconvolution analysis (GEDIT) predicting the immune infiltrate composition in iBIP tumors on dox, during early BRAFi (<30d), during MRD (>30d), and in Braf re-expression-induced relapsing tumors (Rel). F) Tumor growth curves of Brafi-extinguished iBIP tumor xenografts in immunocompetent mice (iBIP) or immune-deficient mice (NSG). The indicated p-value is calculated in an unpaired t-test between groups 30d after tumor extinction.

**FIGURE 2**

**A**

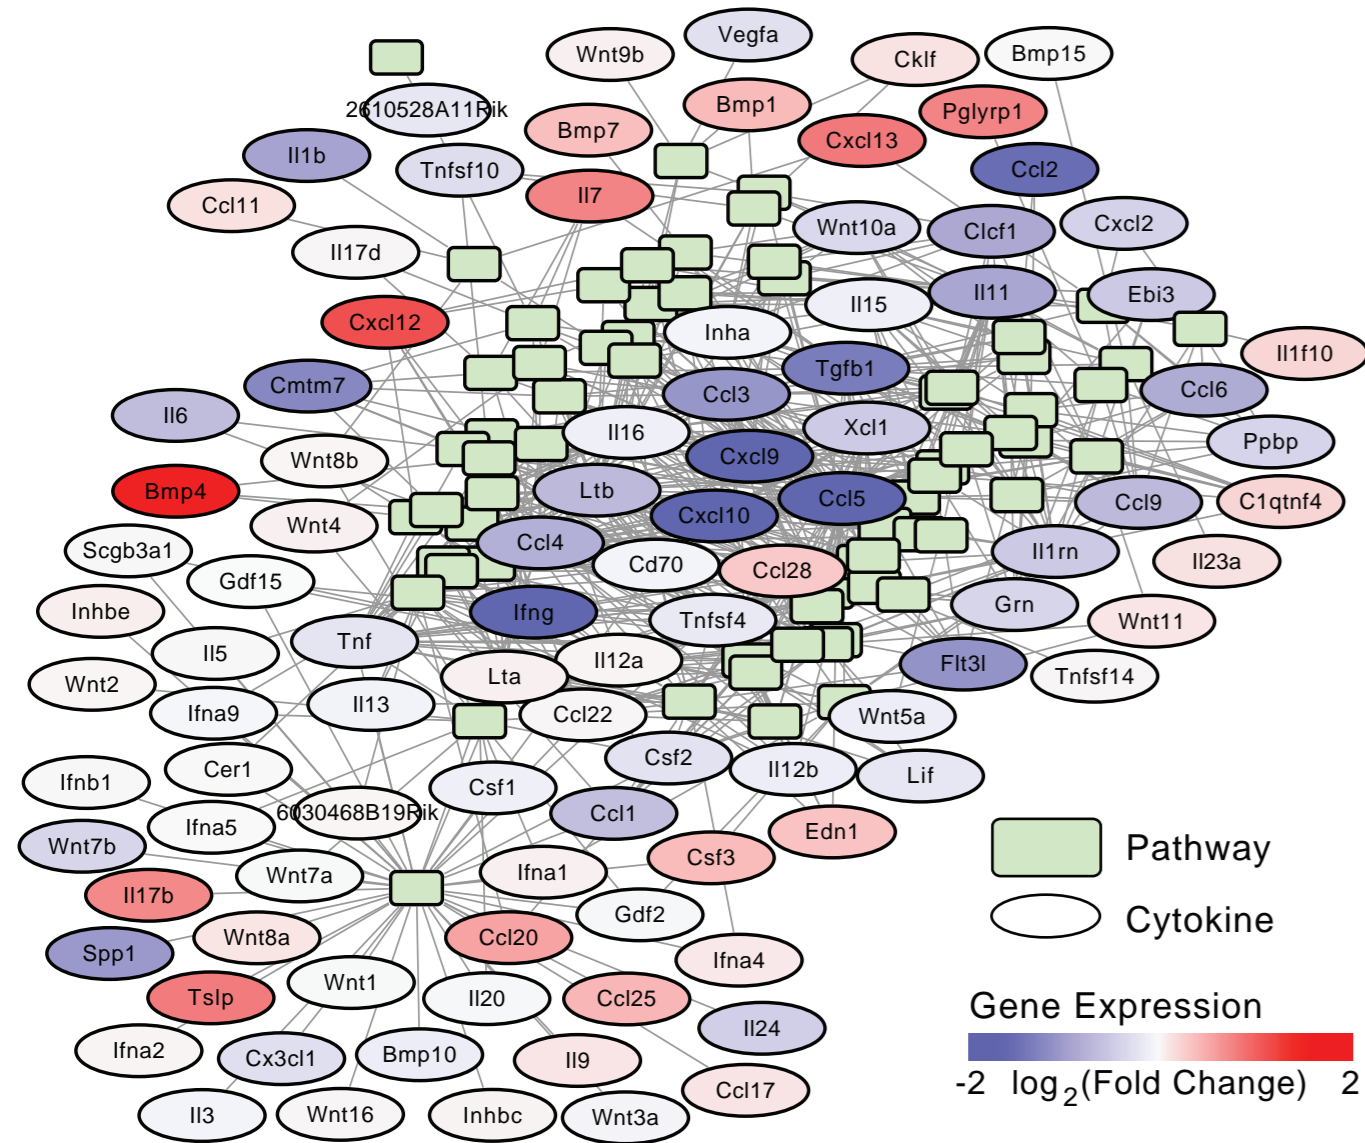

**B**

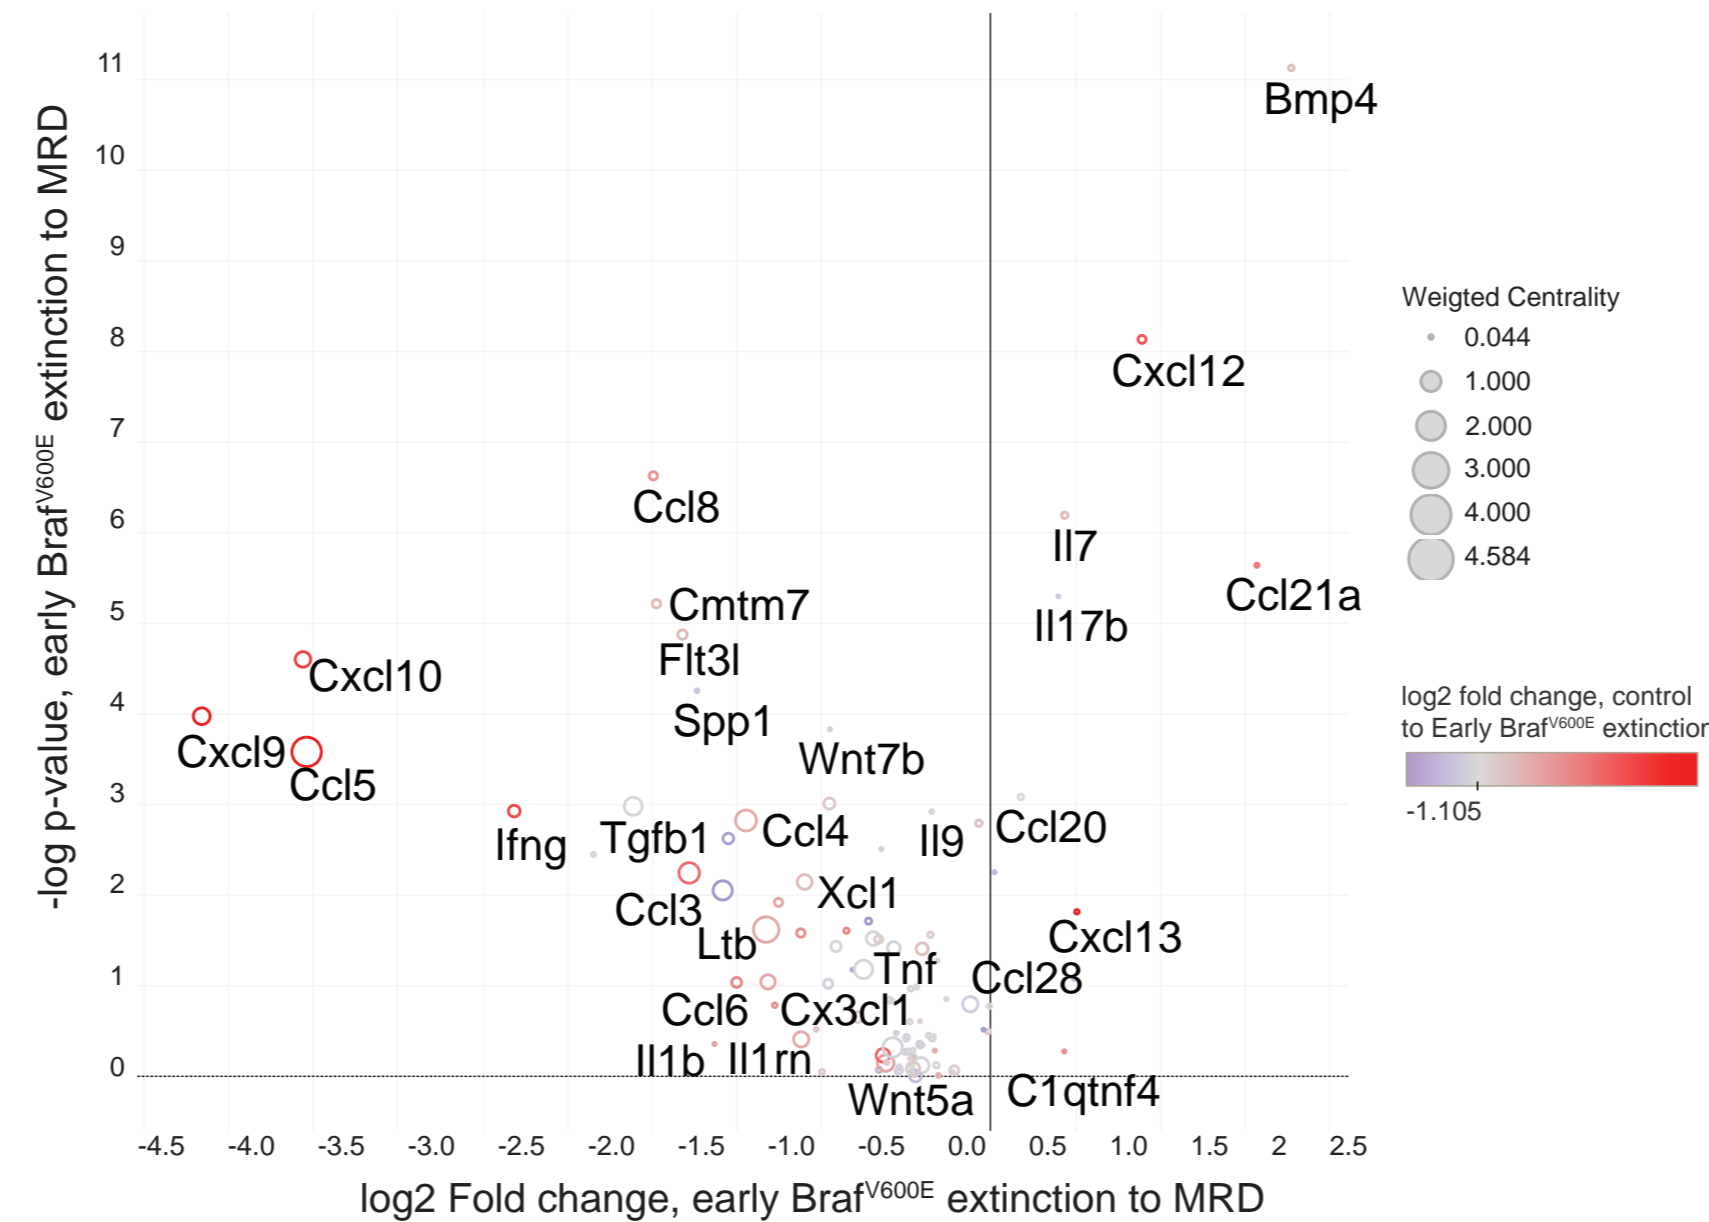

**C**

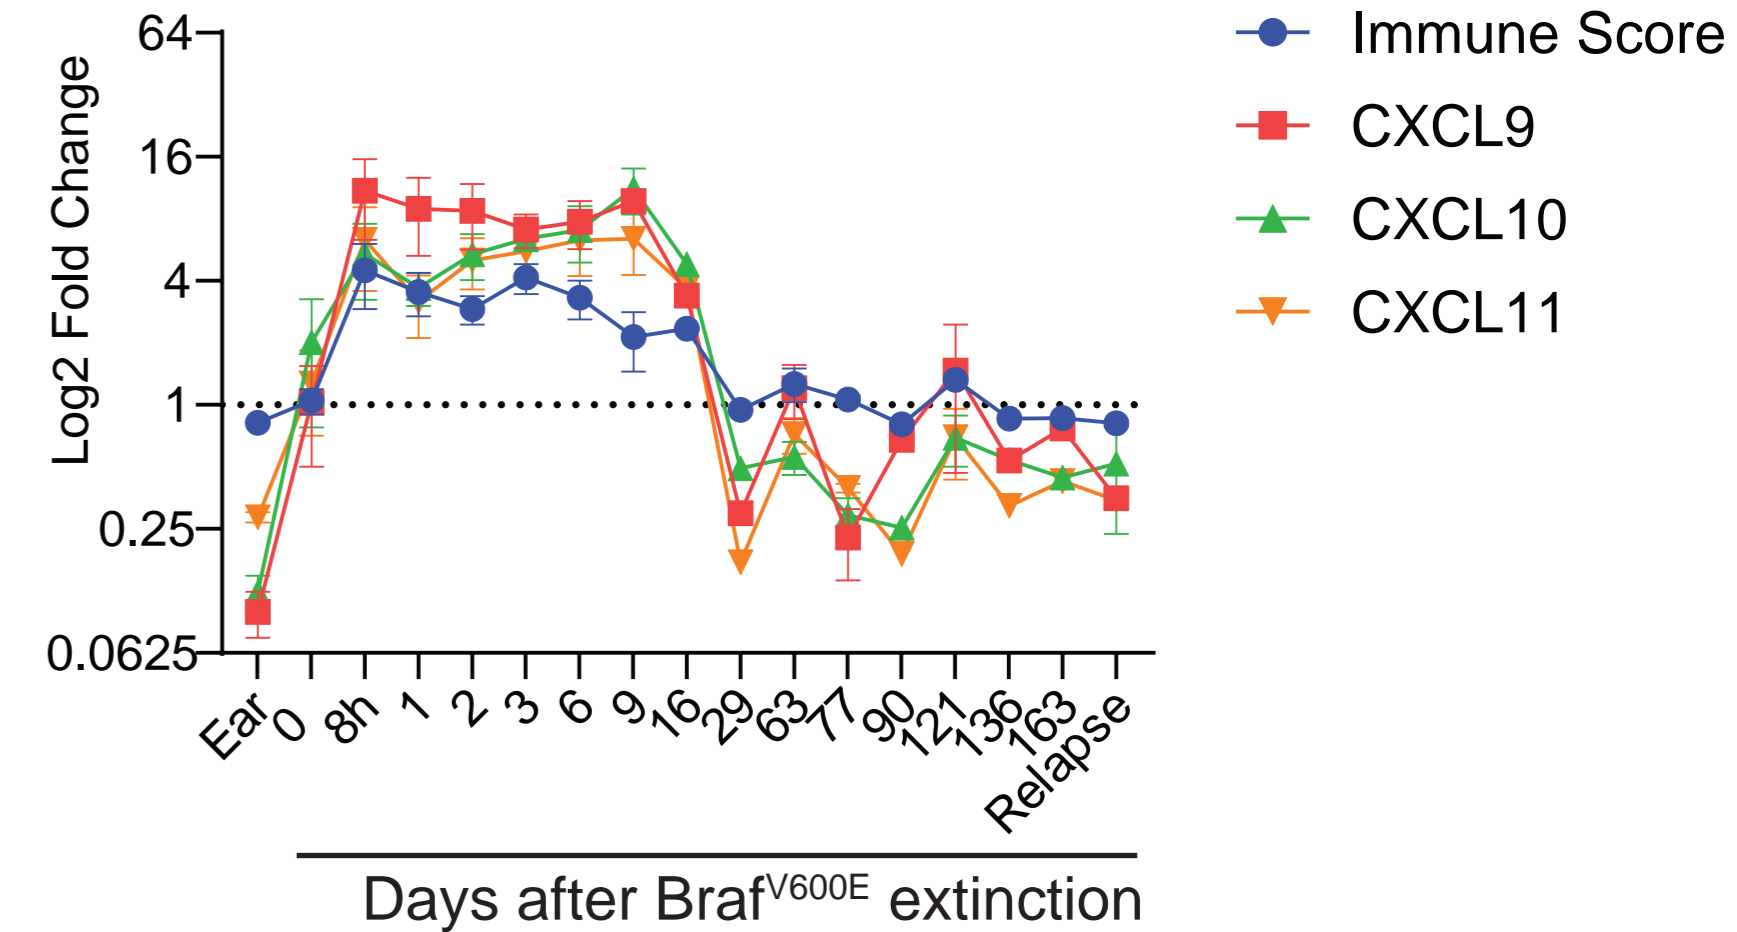

**Figure 2. Cxcr3 ligands are key players in the immune response to BRAF extinction.** A). Visual representation of cytokine-to-pathway connections of the TRAP network. Cytokines (ovals) and relevant associated pathways (rectangles) are shown. Color coding for chemokines represents log<sub>2</sub> fold change in MRD vs. Early BraF extinction. B) Volcano plot representing the log<sub>2</sub> fold change from early BraF extinction to MRD of the indicated chemokines (x-axis), and the corresponding log<sub>2</sub> p-value (y-axis). The size of the circles represents centrality calculated by TRAP, and the color of the circle represents the log<sub>2</sub> fold change from control to early BraF extinction. Only the 102 highest-centrality genes are shown for clarity. C) Cxcl9, Cxcl10, and Cxcl11 expression over time compared with the overall immune signature.

### FIGURE 3

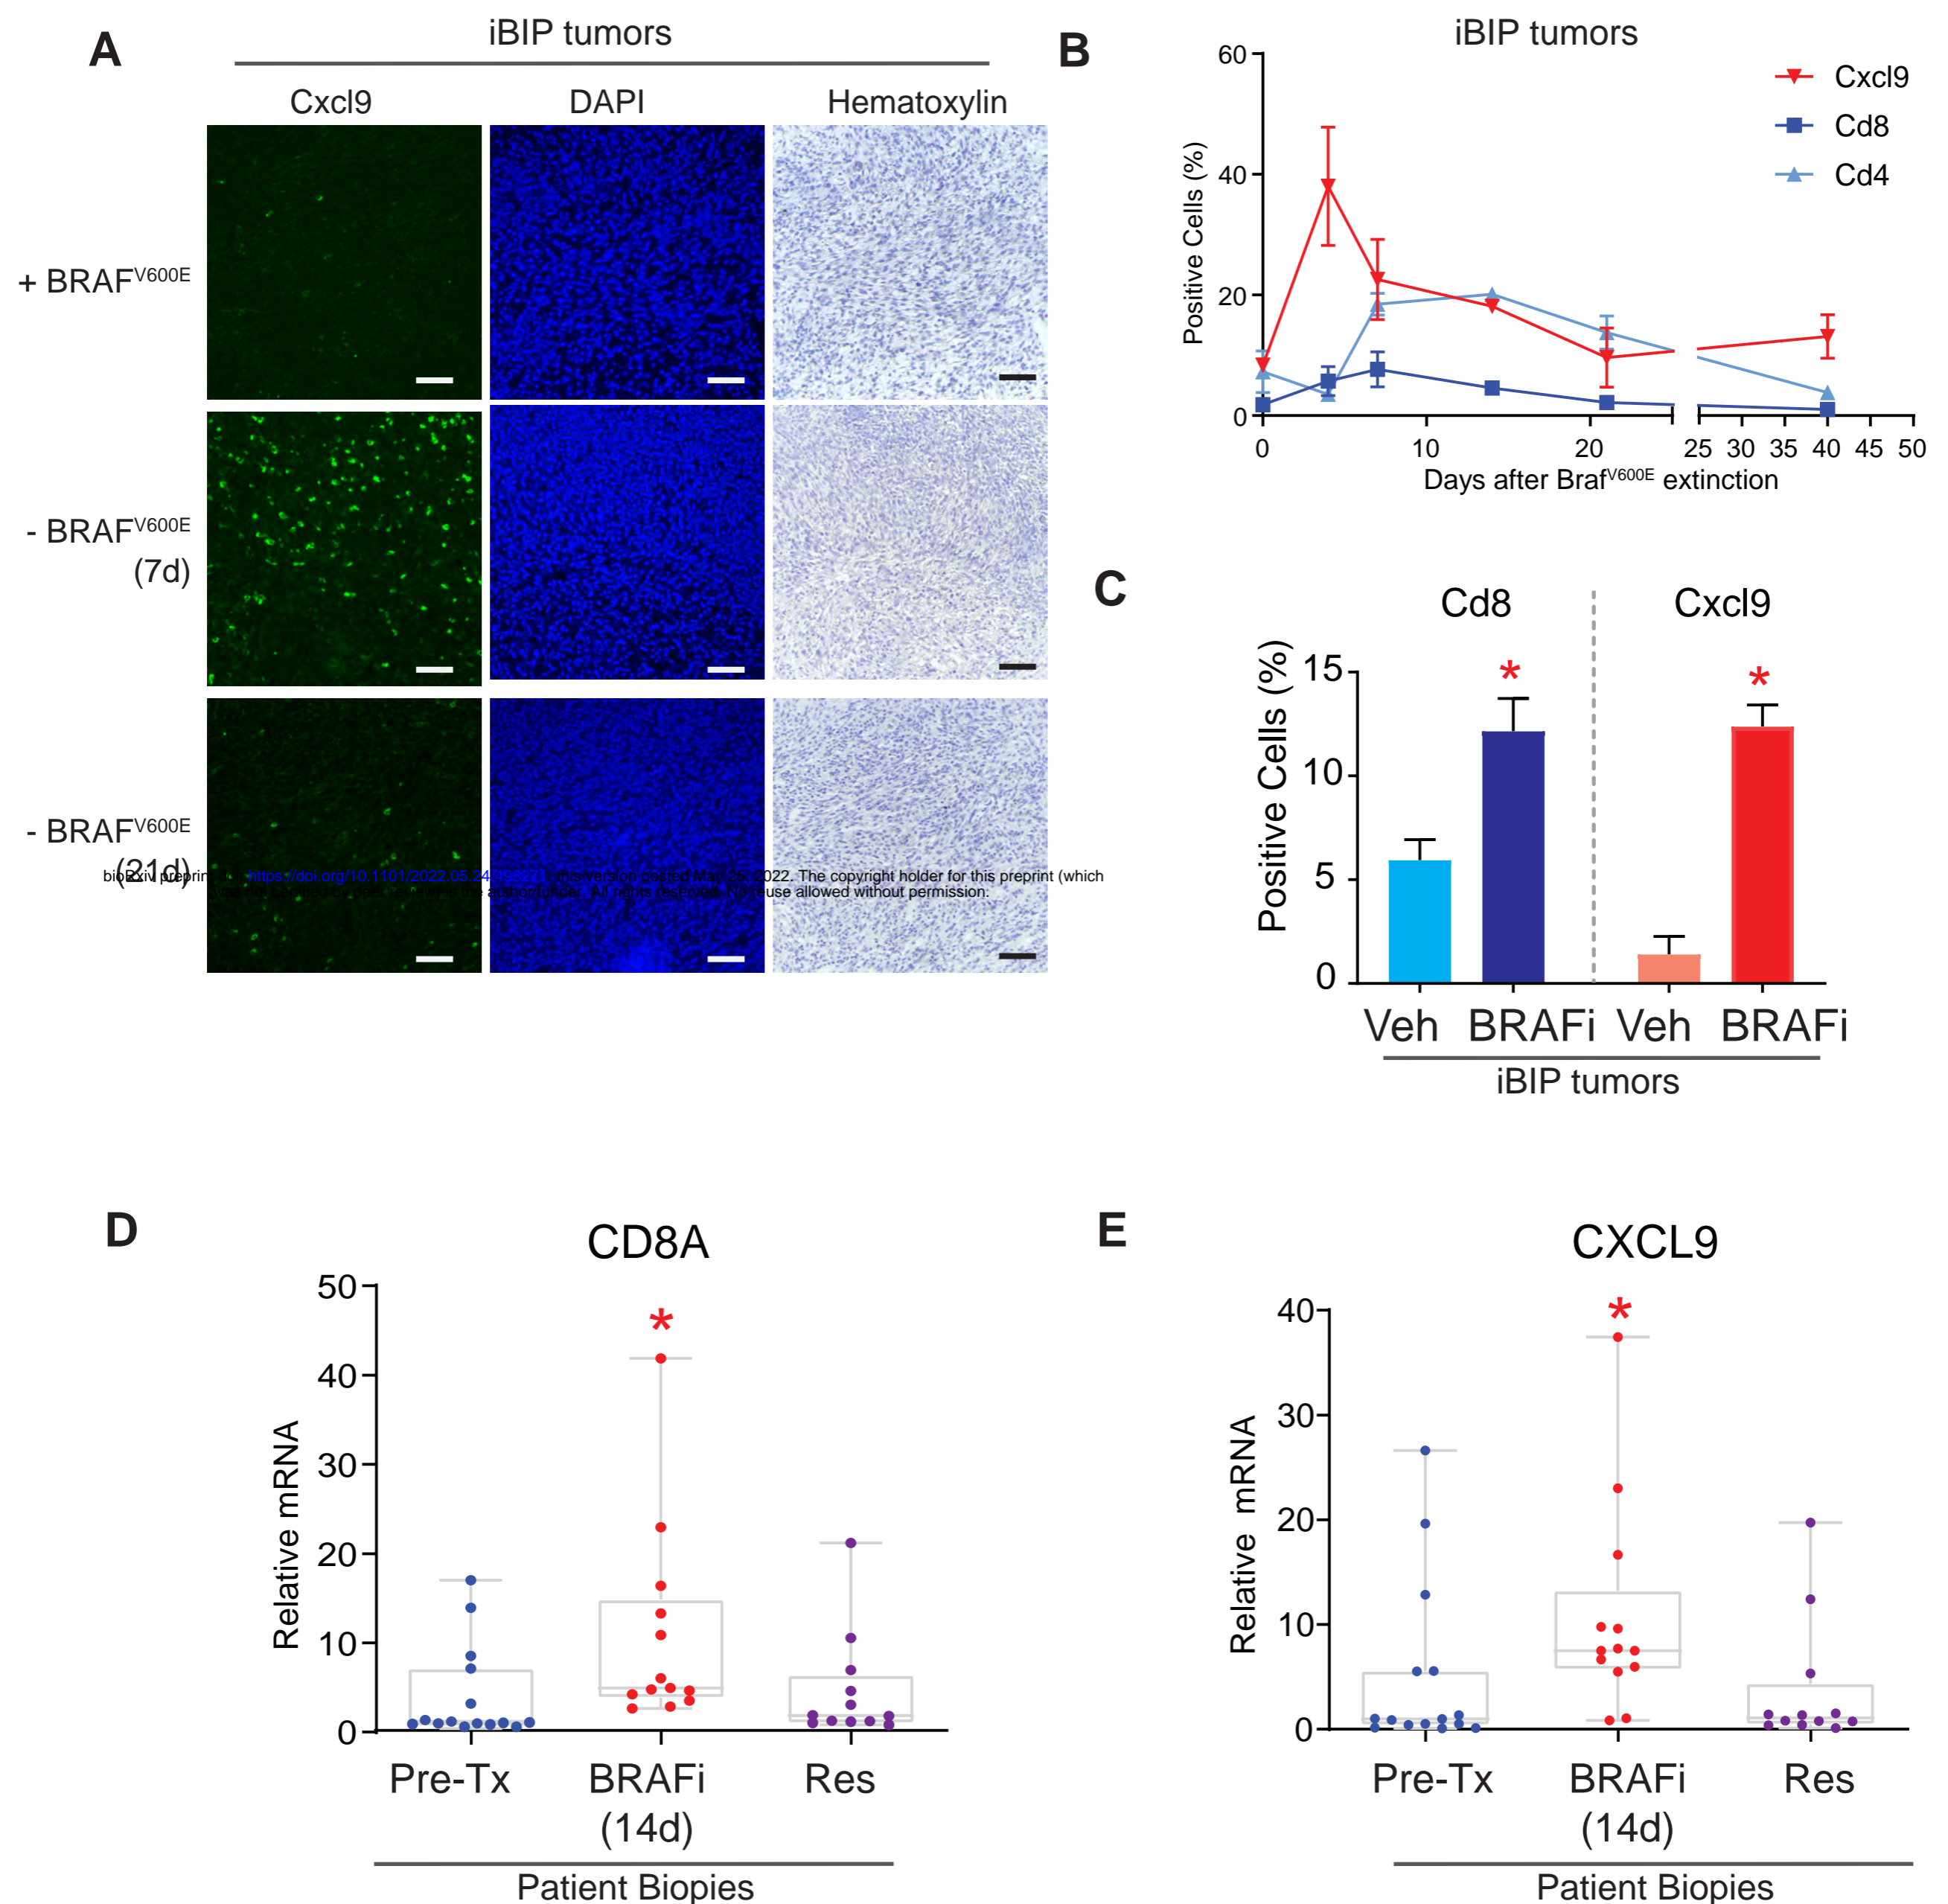

**Figure 3. CXCL9 is induced by genetic and pharmacologic BRAF inhibition in mouse and human tumors.** A) Representative immunofluorescences (IFs) for Cxcl9 protein in iBIP sections, before and after dox withdrawal. DAPI nuclear staining and Hematoxylin staining are shown. Bars represent 100  $\mu$ m. B) IF timecourse quantification of Cxcl9, Cd4, and Cd8 positive cells in iBIP sections after dox withdrawal (n=5, per time point). C) IF quantification of Cxcl9 and Cd8 positive cells in iBIP tumor sections after pharmacologic BRAFi (PLX4720, 417 parts per million, ppm, 1 week of treatment). D) CXCL9 and E) CD8 mRNA levels in melanoma patients pre-treatment, on BRAFi, and resistant to the treatment, as measured by RNAseq(9).

**FIGURE 4**

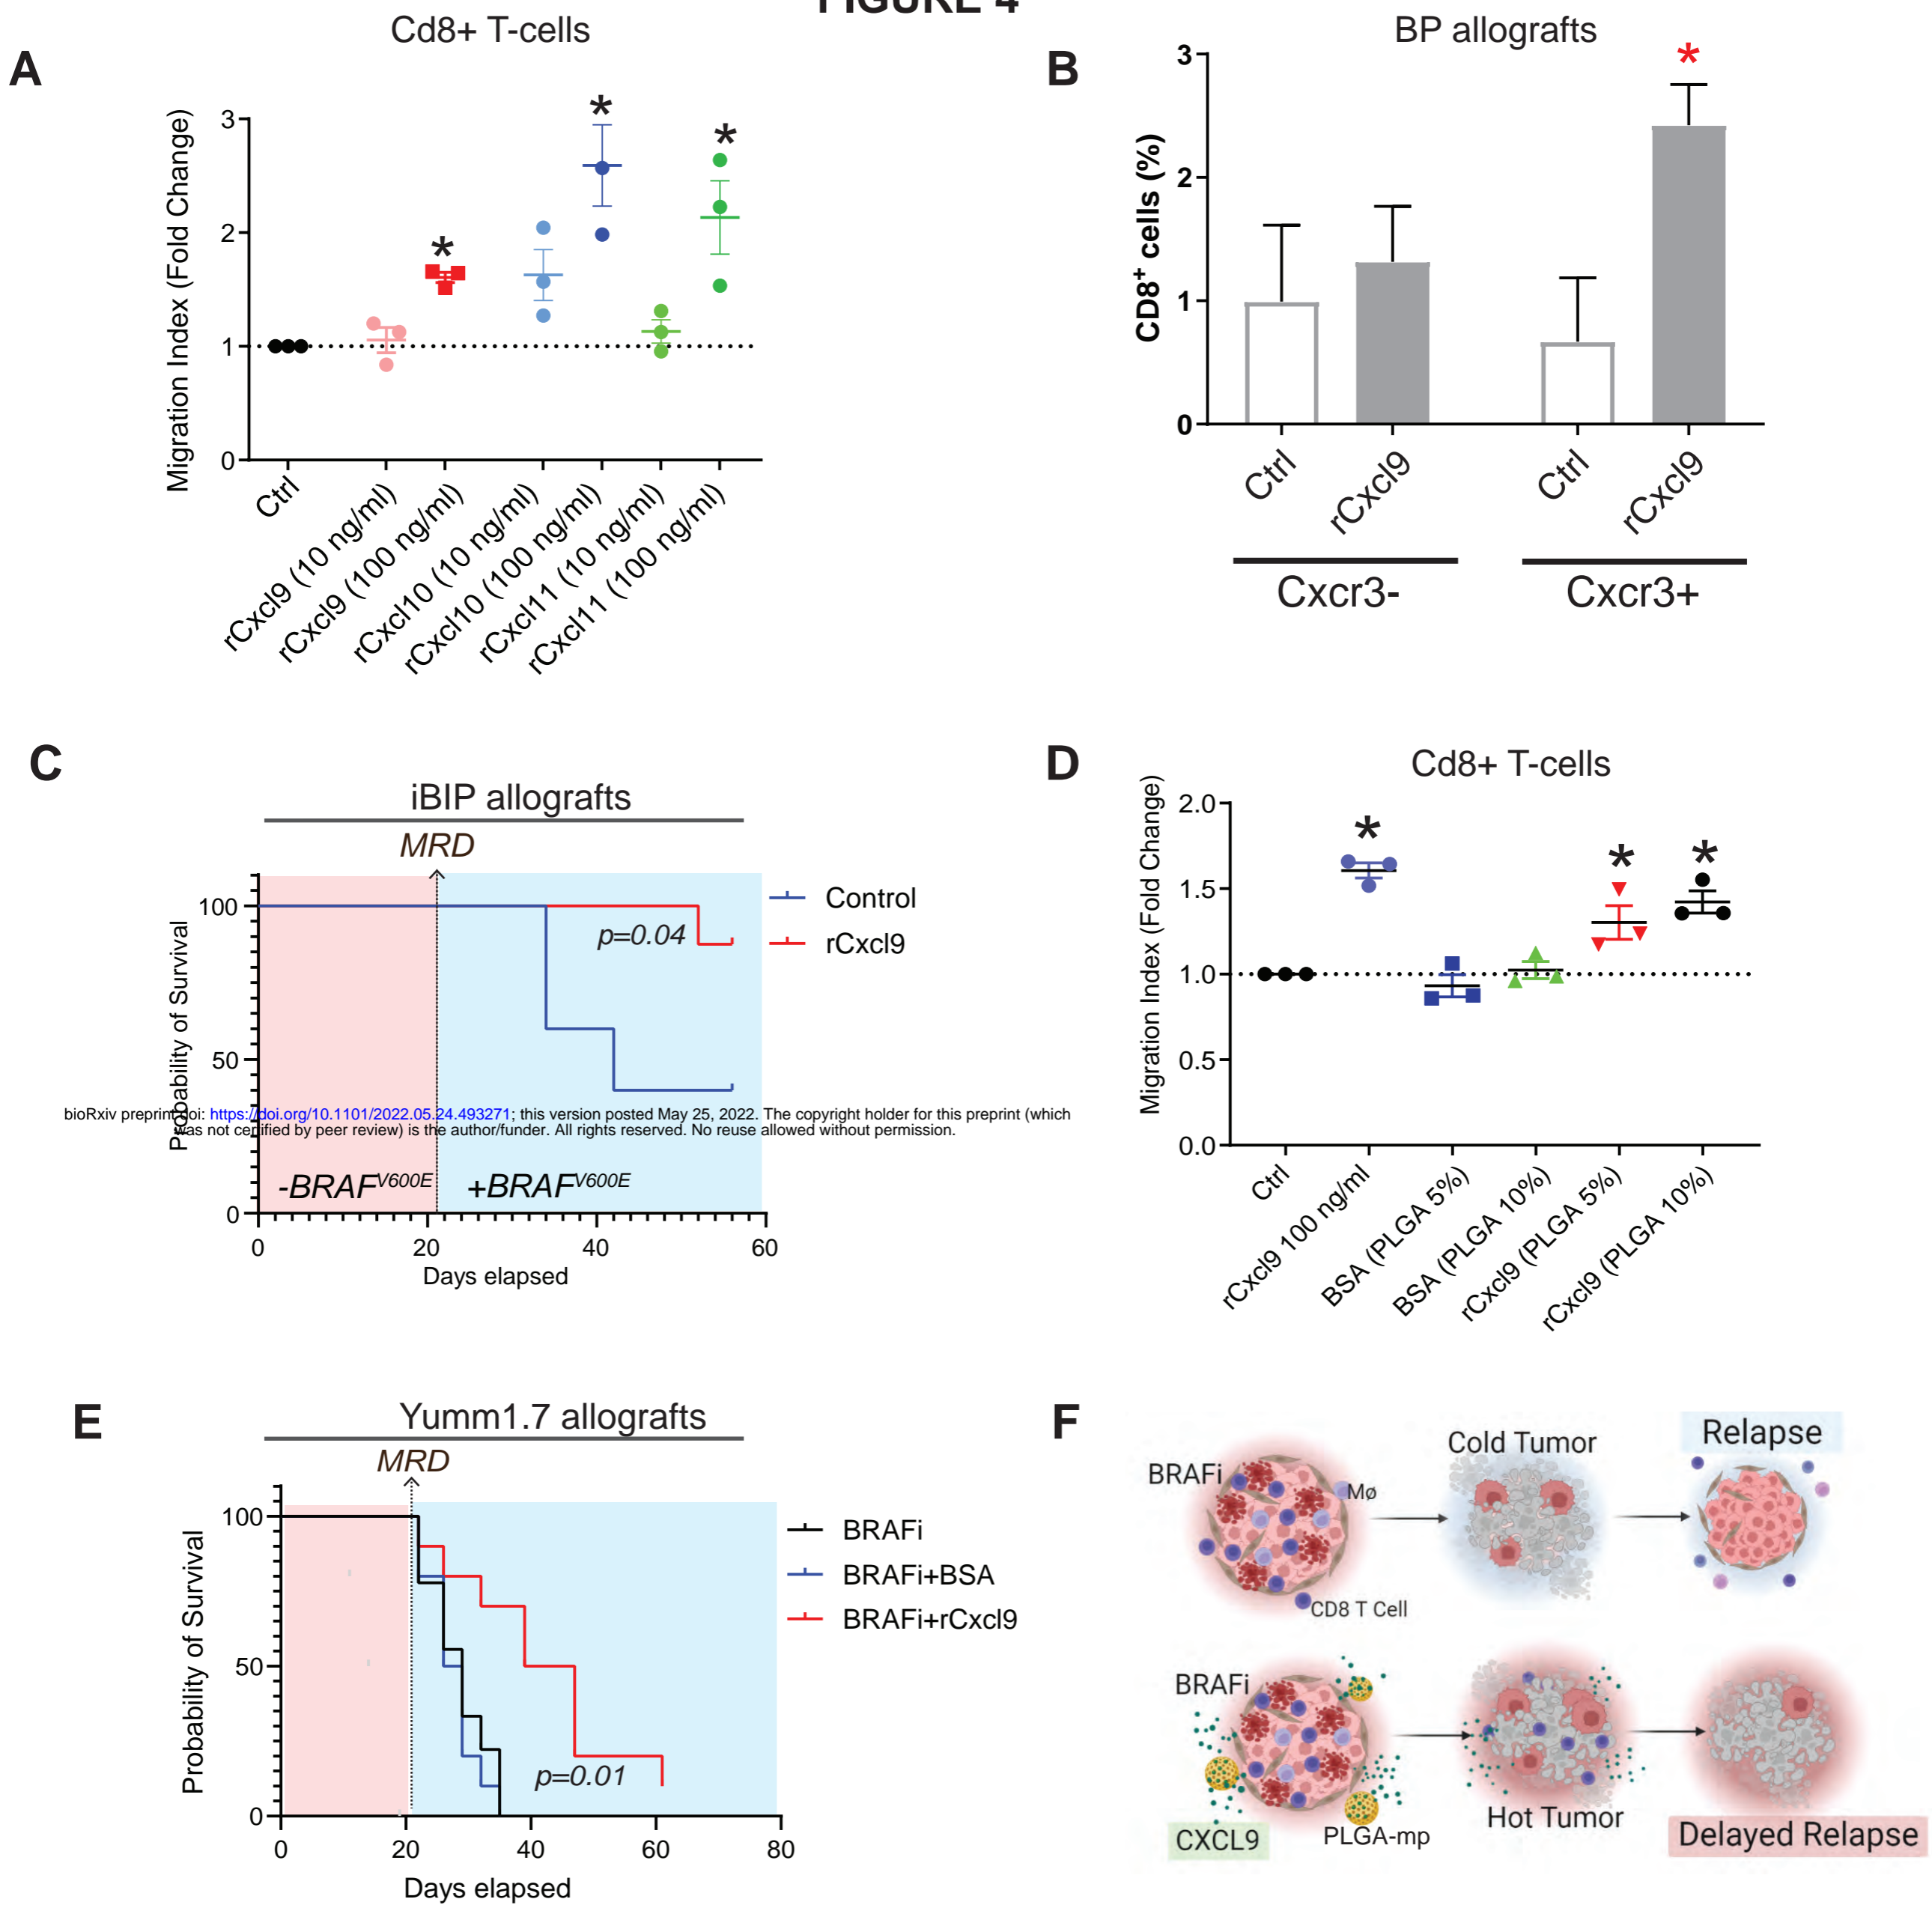

**Figure 4. Recombinant Cxcl9 attracts Cd8 T cells in vitro and in vivo and delays the occurrence of tumor relapse.** A) Transwell migration assay of mouse Cd8+ T-cells using chemokines at the indicated concentrations. The migration index is calculated as the number of cells migrated over the total number of cells. B) Flow Cytometric analysis of Cxcr3+ and Cxcr3- Cd8+ T cell abundance in "BP" tumors after intratumoral injection of rCxcl9 (10 $\mu$ g/administration, for 3 days) or vehicle. C) Survival curves of iBIP allografts injected with rCxcl9 or vehicle (n $\geq$ 5) after dox withdrawal. At MRD establishment, tumors were rechallenged with dox and observed for relapse. A death event is considered as the first tumor doubling after MRD acquisition. D) Transwell migration assay for mCd8+ T cells using BSA- or rCxcl9-loaded PLGA microparticles. The migration index is calculated as the number of cells migrated over the total number of cells. E) Survival curves of Yumm1.7 tumors treated with PLX4720 with or without microparticles that contained BSA or rCxcl9 (n=10). A death event is considered as the first tumor doubling after MRD acquisition. The vehicle control group with no BRAFi needed to be euthanized before BRAFi and therefore cannot be represented on this graph. F) Schematic of the rational treatment approach proposed in the present work.
